# Supplementary material for: Surface-cleaned hydroxyapatite nanowires for aqueous copper ion removal: performance, adsorption mechanisms and membrane filtration application
Source: Royal Society of Chemistry journal article supplement (doi:10.1039/d5ra06089c), 2025-01-01
Supplement: d5ra06089c1.pdf [file d5ra06089c1.pdf]

Supporting information

**Surface-Cleaned Hydroxyapatite Nanowires for Aqueous Copper Ion  
Removal: Performance, Adsorption Mechanisms and Membrane  
Filtration Application**

Yuwei Jiang, Shuang Zhang, Jie Li, Junjun Tan\*

**Corresponding author (\*):**

Junjun Tan;

**Affiliations:**

Hubei Provincial Key Laboratory of Green Materials for Light Industry, School of  
Materials and Chemical Engineering, Hubei University of Technology, Wuhan,  
430068, China

**Tel:** +86 27 5975 0482

**Corresponding author e-mail address:** [tanjunjun2011@hbut.edu.cn](mailto:tanjunjun2011@hbut.edu.cn)

## Detailed Procedures for Adsorption Kinetic Models

The adsorption kinetic data were analyzed using both the pseudo-first-order and pseudo-second-order models.

### Non-Linear Pseudo-First-Order Kinetic Model

#### 1. Model Equation:

The integral form of the pseudo-first-order (Lagergren) model is expressed as:

$$q_t = q_e(1 - e^{-k_1 t})$$

where:

- $q_t$  is the amount of adsorbate adsorbed at time  $t$  (mg g<sup>-1</sup>),
- $q_e$  is the calculated adsorption capacity at equilibrium (mg g<sup>-1</sup>),
- $k_1$  is the pseudo-first-order rate constant (min<sup>-1</sup>),
- $t$  is the contact time (min).

#### 2. Detailed Fitting Steps:

a. Data Preparation: Prepare a two-column data set in your graphing/analysis software. Column A contains the independent variable, time ( $t$ , in minutes). Column B contains the dependent variable, the adsorption capacity at time  $t$  ( $q_t$ , in mg g<sup>-1</sup>).

b. Define the Model: Access the non-linear curve fitting tool (e.g., in OriginPro, select Analysis > Fitting > Nonlinear Curve Fit). Create a new function and define the above equation. Name the function "PseudoFirstOrder".

c. Set Parameters: Assign the variables and parameters as follows:

- Independent Variable:  $t$
- Dependent Variable:  $q_t$
- Parameters:  $q_e$  and  $k_1$

d. Initial Parameter Estimates: Provide initial guesses for the parameters to help the fitting algorithm converge. A reasonable initial guess for  $q_e$  can be the experimentally observed  $q_{e,exp}$  value. For  $k_1$ , an initial guess of 0.01 to 0.1 is often a good starting point.

e. Perform the Fit: Execute the iterative fitting process. The software will use an algorithm (e.g., Levenberg-Marquardt) to find the values of  $q_e$  and  $k_1$  that minimize the sum of squared residuals between the experimental  $q_t$  data and the model curve.

f. Output and Validation: The fitting result will provide the best-fit values for  $q_e$  and  $k_1$ , along with their standard errors. The goodness of fit is typically evaluated using

the coefficient of determination ( $R^2$ ) and the adjusted  $R^2$ . The fitted curve should be visually compared to the experimental data points to ensure a good match across the entire time range.

### Linear Pseudo-Second-Order Kinetic Model

#### 1. Model Equation:

The linearized form of the pseudo-second-order model is expressed as:

$$\frac{t}{q_t} = \frac{1}{k_2 q_e^2} + \frac{t}{q_e}$$

where:

- $q_t$  is the amount of adsorbate adsorbed at time  $t$  ( $\text{mg g}^{-1}$ ),
- $q_e$  is the calculated adsorption capacity at equilibrium ( $\text{mg g}^{-1}$ ),
- $k_2$  is the pseudo-second-order rate constant ( $\text{g mg}^{-1} \text{min}^{-1}$ ),
- $t$  is the contact time (min).

#### 2. Detailed Fitting Steps:

a. Data Transformation: Prepare a new data set for linear regression. Calculate a new Y-value,  $t/q_t$ , for each corresponding time point ( $t$ ).

b. Data Preparation: Create a two-column data set for the linear plot. Column A contains the independent variable, time ( $t$ ). Column B contains the new dependent variable,  $t/q_t$  (with units of  $\text{min g mg}^{-1}$ ).

c. Perform Linear Regression: Perform a standard linear regression on the transformed data ( $t$  vs.  $t/q_t$ ) using the software's linear fitting tool (e.g., Analysis > Fitting > Linear Fit). The model for the regression is a straight line:  $y = A + Bx$ , where  $y = t/q_t$  and  $x = t$ .

d. Extract Parameters: The slope and intercept of the best-fit line are used to calculate the kinetic parameters:

- The slope of the line is equal to  $1/q_e$ .

$$\text{Slope} = \frac{1}{q_e} \Rightarrow q_e = \frac{1}{\text{Slope}}$$

- The intercept of the line is equal to  $1/(k_2 q_e^2)$ .

$$\text{Intercept} = \frac{1}{k_2 q_e^2} \Rightarrow k_2 = \frac{1}{\text{Intercept} \times q_e^2}$$

e. Goodness of Fit: The goodness of fit for the linear model is evaluated by the coefficient of determination ( $R^2$ ) of the linear regression of  $t$  vs.  $t/q_t$ .



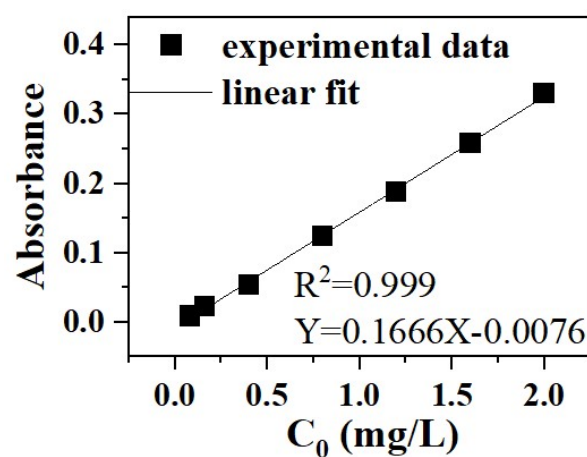

Figure S1. Standard curve showing the linear relationship between copper ion concentration and absorbance (pH = 5.5). The regression equation was  $Y = 0.1666X - 0.0076$  with a correlation coefficient ( $R^2$ ) of 0.999.

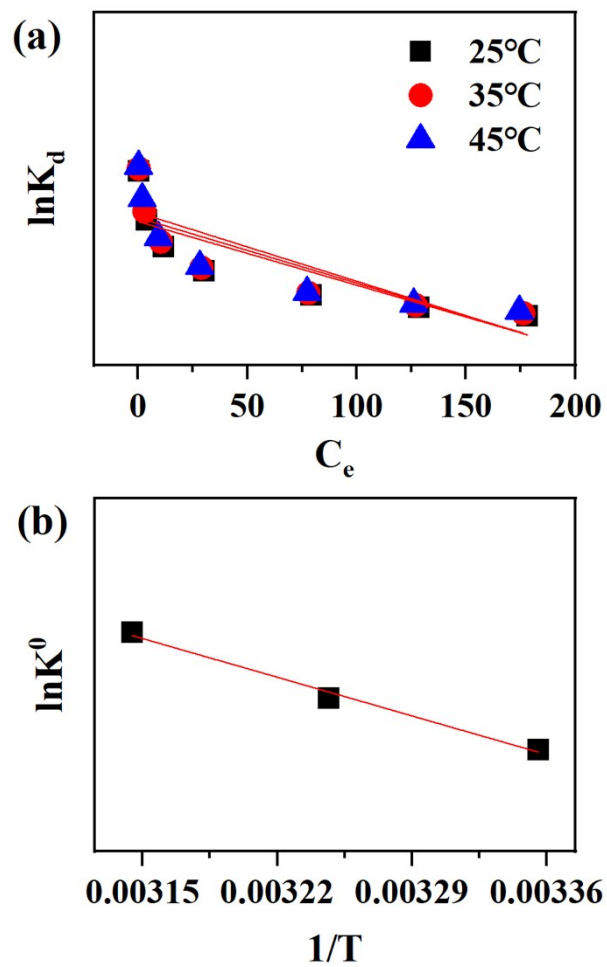

Figure S2. Linear fitting of thermodynamic parameters for copper ion adsorption: (a) plots of  $\ln K_d$  versus  $C_e$ ; (b) plots of  $\ln K^0$  versus  $1/T$  for sample ET-70. Experimental conditions: initial copper ion concentration = 10–200 mg/L, adsorbent dose = 0.4 g/L, temperature = 25°C, and pH = 5.5.

Table S1 The content changes of calcium and phosphorus elements in ET-70 before and after the adsorption of copper ions

| Sample   | Species | BE (eV) | Percent (%) |
|----------|---------|---------|-------------|
| ET-70    | Ca 2p   | 346.00  | 37.80       |
|          | P 2p    | 131.91  | 28.20       |
| ET-70-Cu | Ca 2p   | 346.12  | 31.97       |
|          | P 2p    | 132.11  | 26.70       |
